# Supplementary material for: Efficacy of Posidonia oceanica Extract against Inflammatory Pain: In Vivo Studies in Mice
Source: MDPI journal article supplement (doi:10.3390/md19020048), 2021-01-21
Supplement: s1 [file s1]

## Supplementary material

**Table S1.** Mice were injected intraperitoneally (i.p.) with a 0.6 % solution of acetic acid. The number of stretching movements was counted for 10 min, starting 5 min after acetic acid injection. POE was suspended in 1% carboxymethylcellulose sodium salt (CMC) and orally administered 20 min before acetic acid injection. Measurements were performed on 10 mice for each treatments carried out in 2 different experimental sets.

| <b>Treatment</b>           | <b>Number of stretching</b> |
|----------------------------|-----------------------------|
| Acetic ac. + vehicle       | 35.0 ± 1.5                  |
| Acetic ac. + POE 100 mg/kg | 35.7 ± 4.8                  |
